# Supplementary material
Source: PubMed Central journal article supplement (PMC6814185)

# Supplementary Figure S1

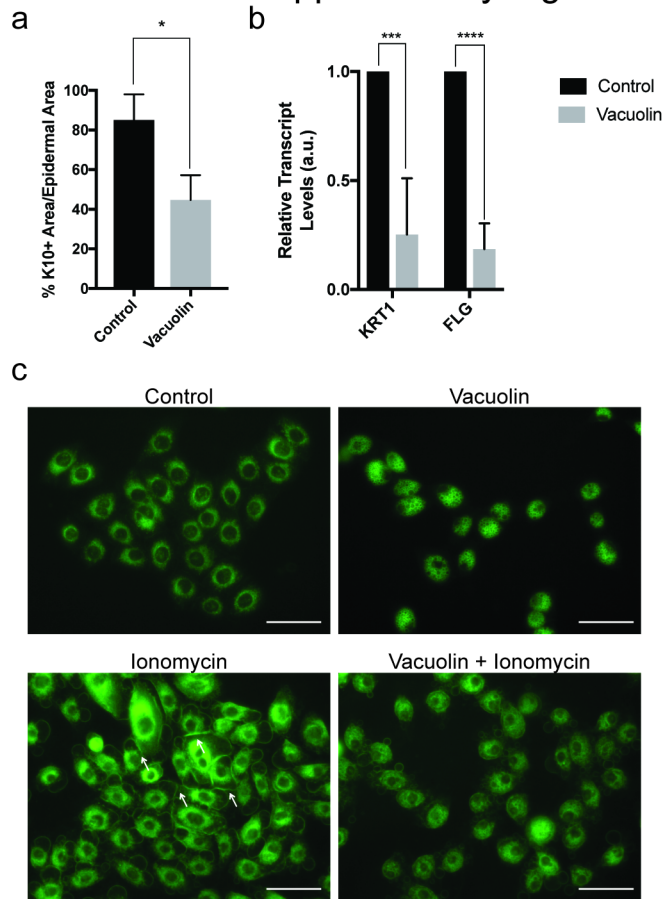

# Supplementary Figure S2

a

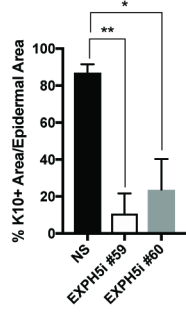

b

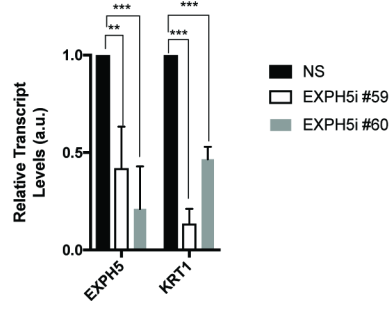

c

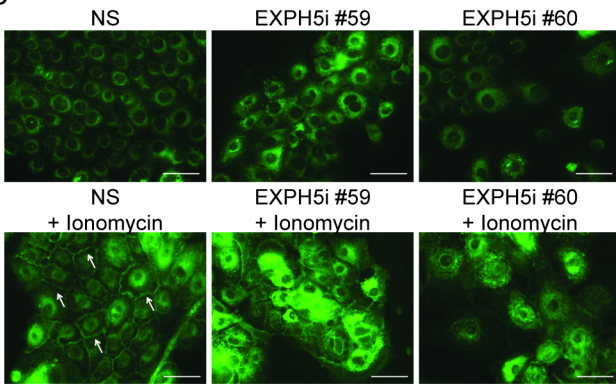

# Supplementary Figure S3

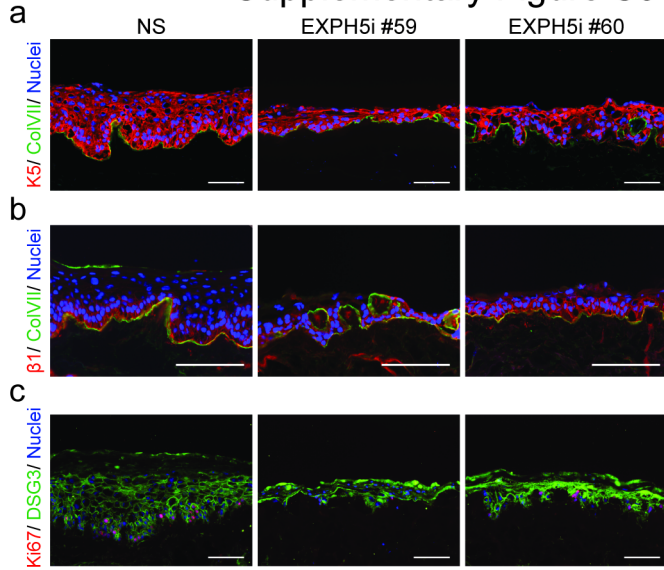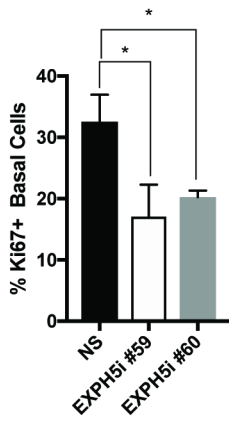

Supplementary Figure S4

a

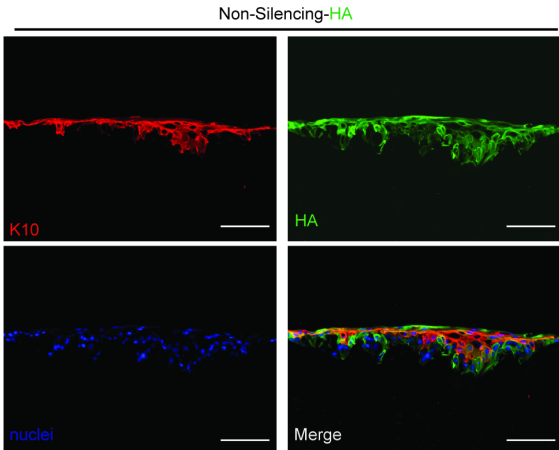

b

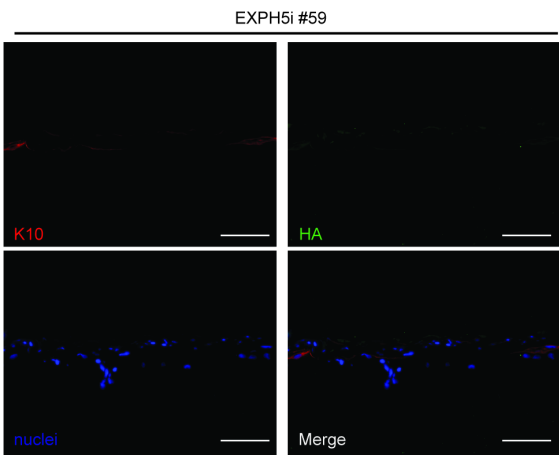

c

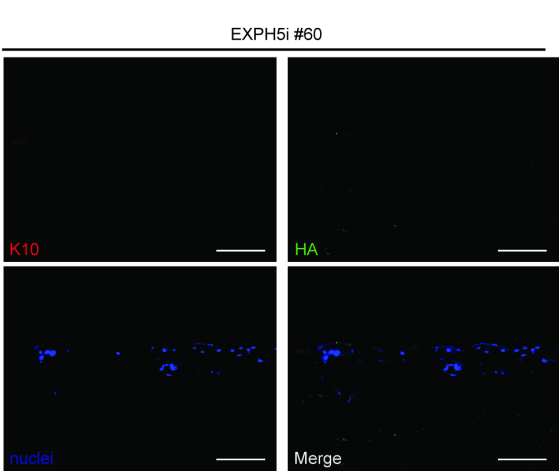

d

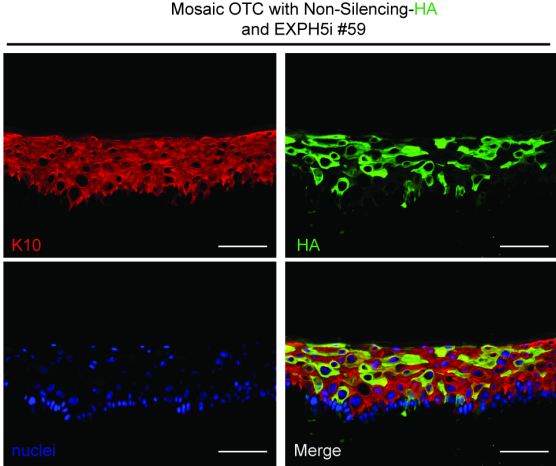

e

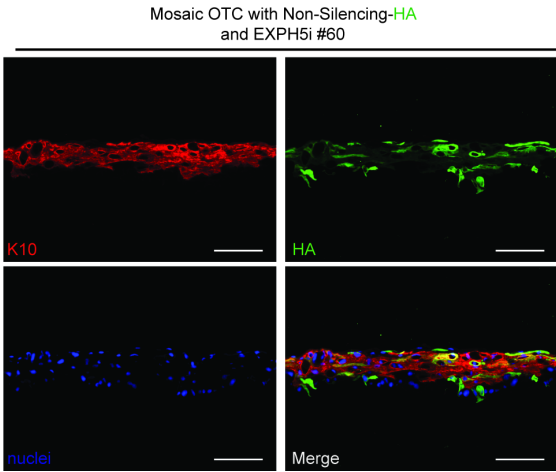

# Supplementary Figure S5

a

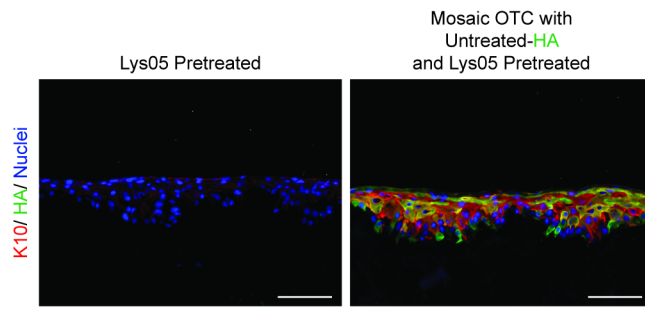

b

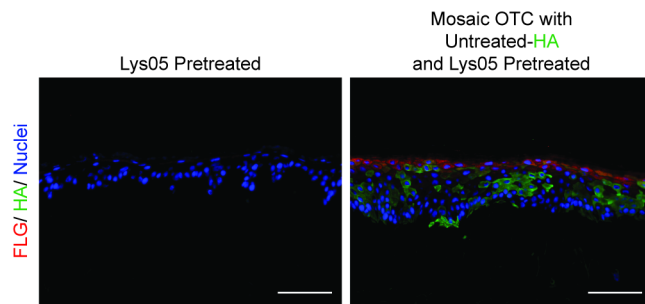

c

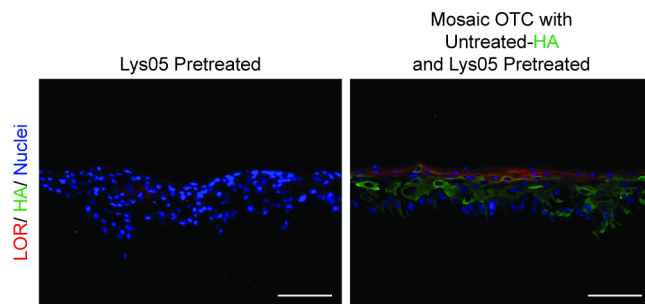

Supplement: NIHMS1529165-supplement-1.pdf [file NIHMS1529165-supplement-1.pdf]
